# Supplementary material for: Correlation of Circulating CD64+/CD163+ Monocyte Ratio and stroma/peri-tumoral CD163+ Monocyte Density with Human Papillomavirus Infected Cervical Lesion Severity
Source: Springer Nature journal article supplement (doi:10.1007/s12307-017-0200-2), 2017-10-24
Supplement: MOESM1 [file 15159568]

**Supplemental Table 1.** Primer sequences for M2 macrophage gene with real-time PCR analysis

| **Target Genes** | **Forward primer (5’)** | **Reverse primer (5’)** | **Annealing temperature (oC)** | **Product size (bp)** |
| --- | --- | --- | --- | --- |
| Arg1 | AAGATTCCCGATGTGCCAGG | GTCCACGTCTCTCAAGCCAA | 55 | 87 |
| hCD163 | CGGCTTGCAGTTTCCTCAAGA | AATCAGCTGACTCATGGGAATTTT | 55 | 130 |
| hGAPDH | CGCTCTCTGCTCCTCCTGTT | CCATGGTGTCTGAGCGATGT | 55 | 81 |

Arg1, arginase 1; hCD163, human CD163; hGAPDH, human glyceraldehyde 3-phosphate dehydrogenase.
